# Supplementary material
Source: publisher site journal article supplement (https://www.spandidos-publications.com/3667/downloadSupplementary)

Figure S1. Confirmation of transfection efficiency. (A) Overexpression of miR-29c-3p. (B) Knockdown of miR-29c-3p. (C) Overexpression of CRNDE. (D) Overexpression of NASP. \*\*P<0.01 and \*\*\*P<0.001 vs. NC. miR, microRNA; CRNDE, lncRNA colorectal neoplasia differentially expressed; NASP, nuclear autoantigenic sperm protein; NC, negative control; inh, inhibitor.

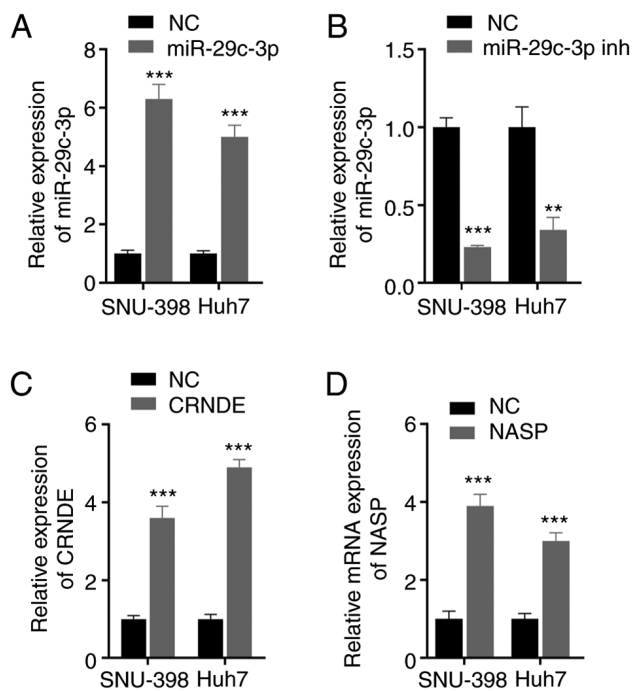

Supplement: Supplementary file 1 [file downloadSupplementary]
